# Supplementary material
Source: PubMed Central journal article supplement (PMC6906241)
Supplement: NIHMS1057946-supplement-Figure_S1.pdf [file NIHMS1057946-supplement-Figure_S1.pdf]

Supplemental Figure 1: Incidence Trends in Extranodal NK/T-cell Lymphoma, Nasal Type (2001-2015)

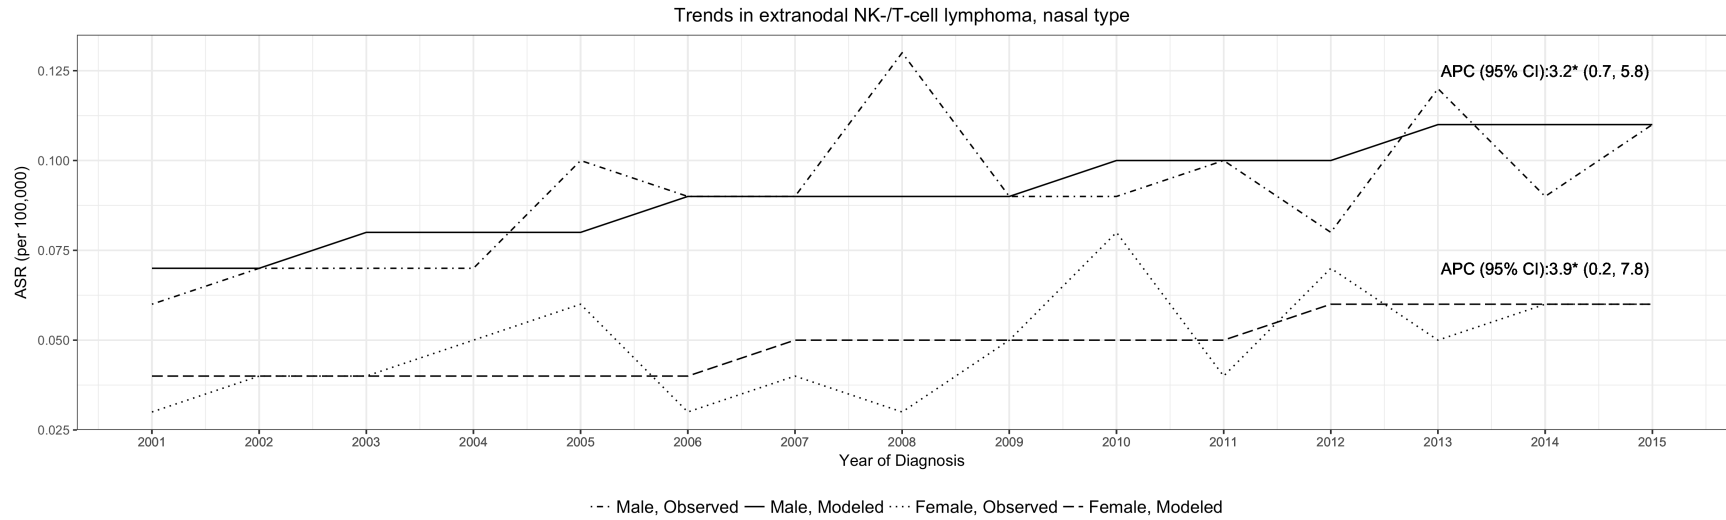

| Sex          | White           |                 | Black           |                  | Other           |                 |
|--------------|-----------------|-----------------|-----------------|------------------|-----------------|-----------------|
|              | Male            | Female          | Male            | Female           | Male            | Female          |
| N (%)        | 397 (45.6)      | 226 (26.0)      | 34 (3.9)        | 11 (1.3)         | 118 (13.6)      | 85 (9.8)        |
| APC (95% CI) | 3.8* (0.6, 7.1) | 4.1* (0.7, 7.6) | 0.6 (-6.2, 8.0) | 3.9 (-4.2, 12.8) | 0.4 (-4.6, 5.7) | 1.8 (-3.6, 7.4) |
