# Supplementary material
Source: PubMed Central journal article supplement (PMC6906241)

Supplemental Figure 2: Age Distribution of Nasopharyngeal Carcinoma Cases by Race and Subtype, SEER 1973-2015

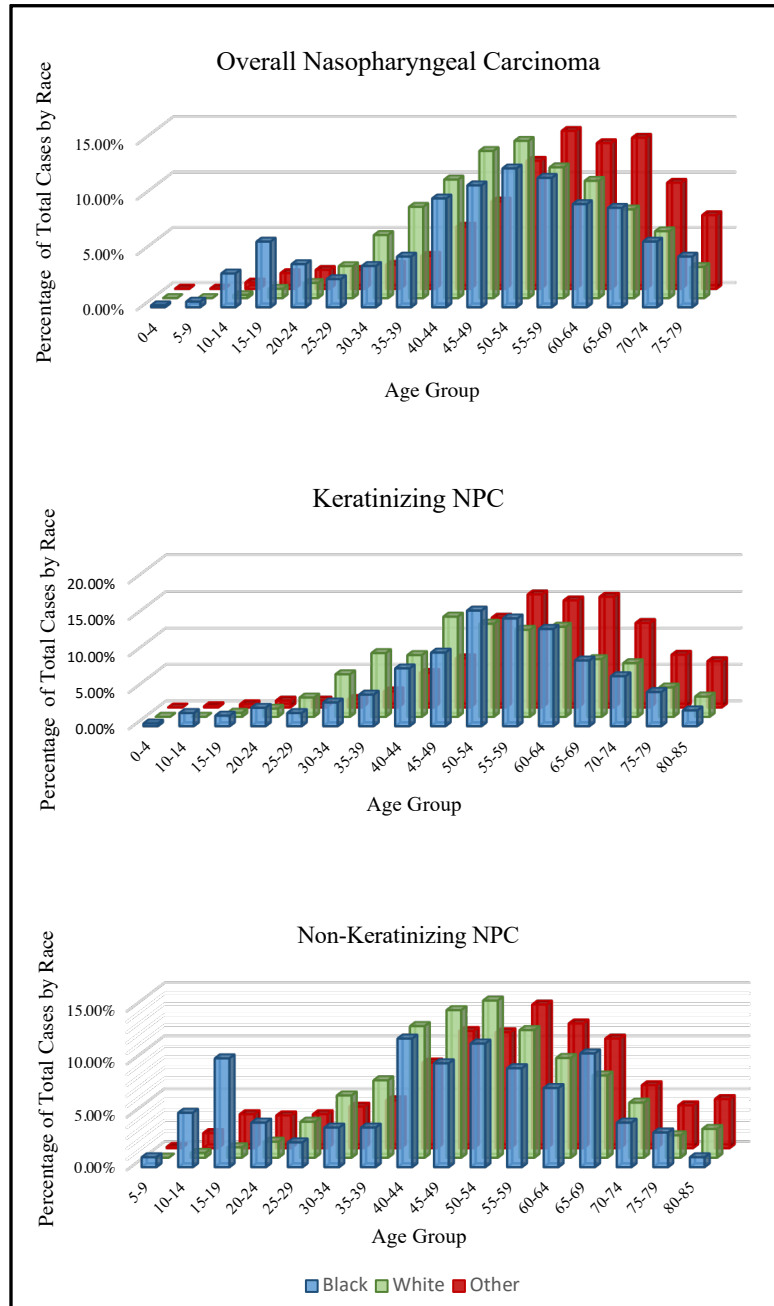

Supplement: NIHMS1057946-supplement-Figure_S2.pdf [file NIHMS1057946-supplement-Figure_S2.pdf]
